# Supplementary material for: Gene expression-based prediction of myeloma cell sensitivity to histone deacetylase inhibitors
Source: PubMed Central journal article supplement — Br J Cancer. 2013 Jul 18;109(3):676–85. doi: 10.1038/bjc.2013.392 (PMC3739014; doi:10.1038/bjc.2013.392), 2013-07-18
Supplement: bjc2013392x1.pdf [file bjc2013392x1.pdf]

RPMI 8226  
Control 24H

RPMI 8226  
Panobinostat  
24H

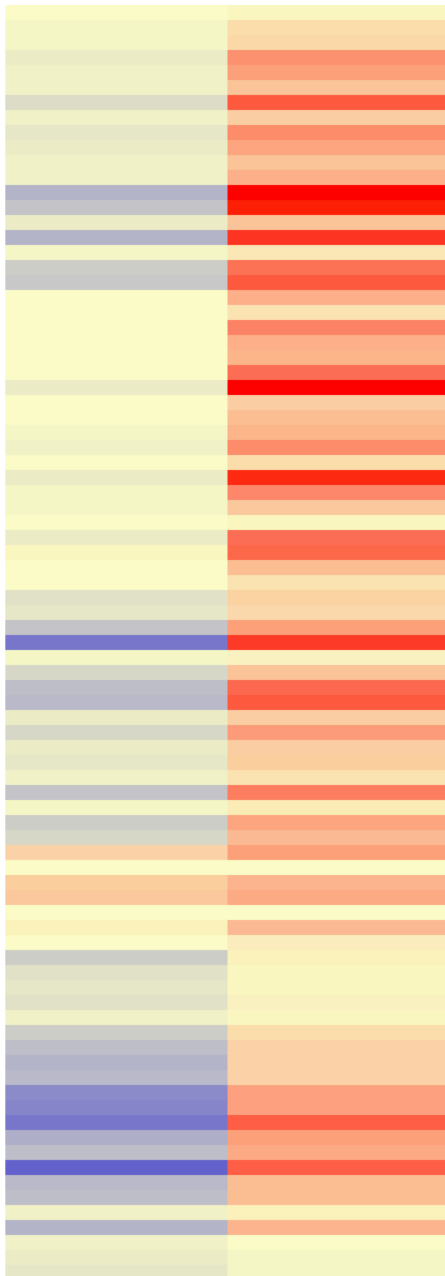

**Supplementary Figure S1: Genes upregulated by TSA are also upregulated by Panobinostat (20nM) in RPMI8226 myeloma cell line.** RPMI8226 cells were treated for 24 H with or without Panobinostat (20nM) and gene expression profiled with Affymetrix U133 plus 2.0 microarrays (see online Gene Expression Omnibus, <http://www.ncbi.nlm.nih.gov/geo/>, accession number GSE30524). Probe set signals are displayed from low (deep blue) to high (deep red) expression.

Low  High  
Expression scale
