# Supplementary material for: Gene expression-based prediction of myeloma cell sensitivity to histone deacetylase inhibitors
Source: PubMed Central journal article supplement — Br J Cancer. 2013 Jul 18;109(3):676–85. doi: 10.1038/bjc.2013.392 (PMC3739014; doi:10.1038/bjc.2013.392), 2013-07-18
Supplement: bjc2013392x2.pdf [file bjc2013392x2.pdf]

HA Score: Bad prognostic genes

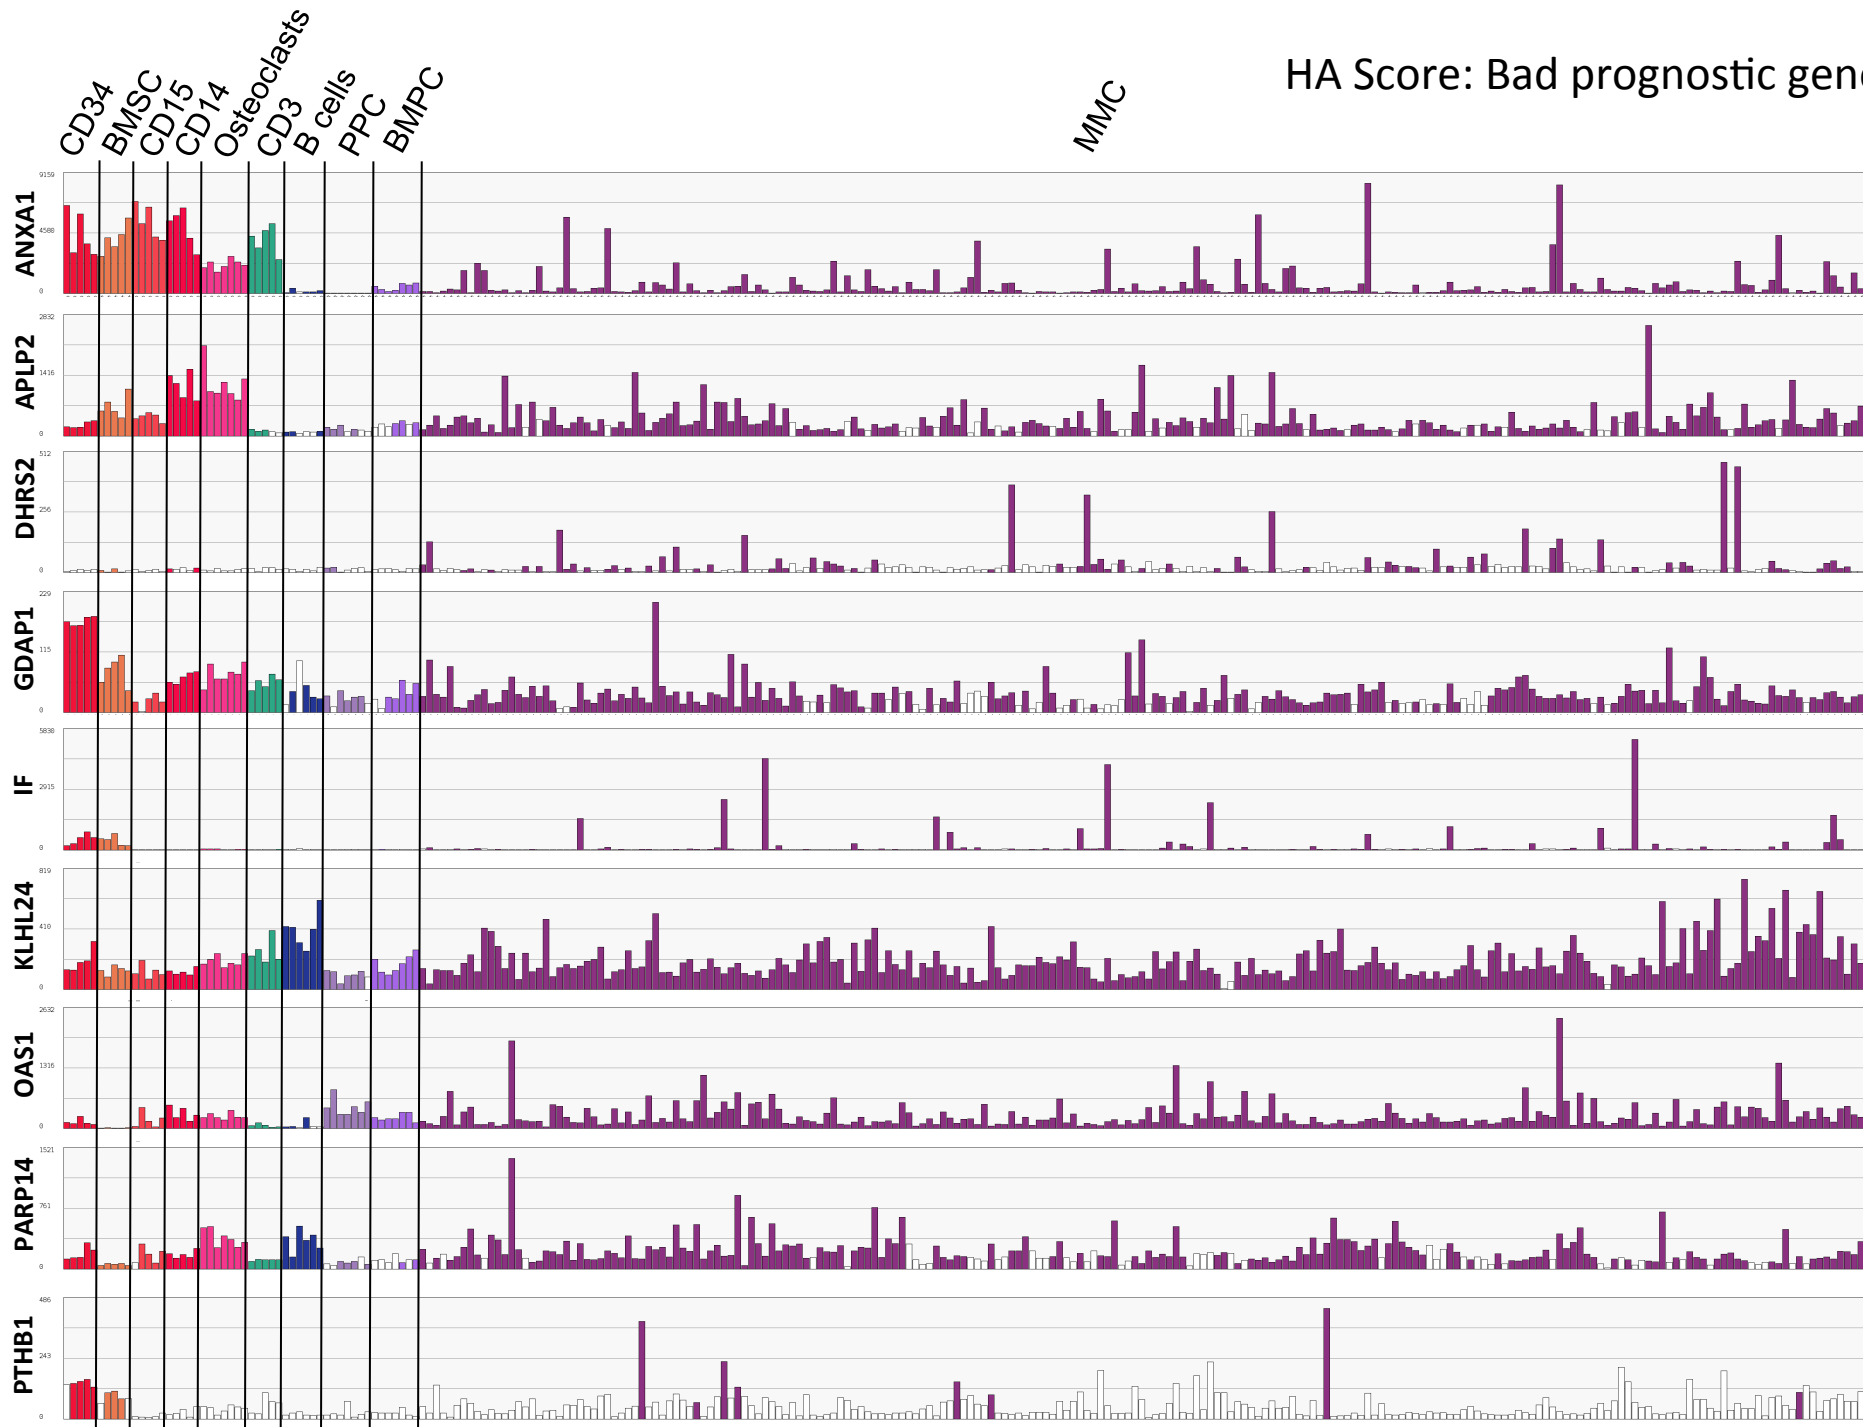

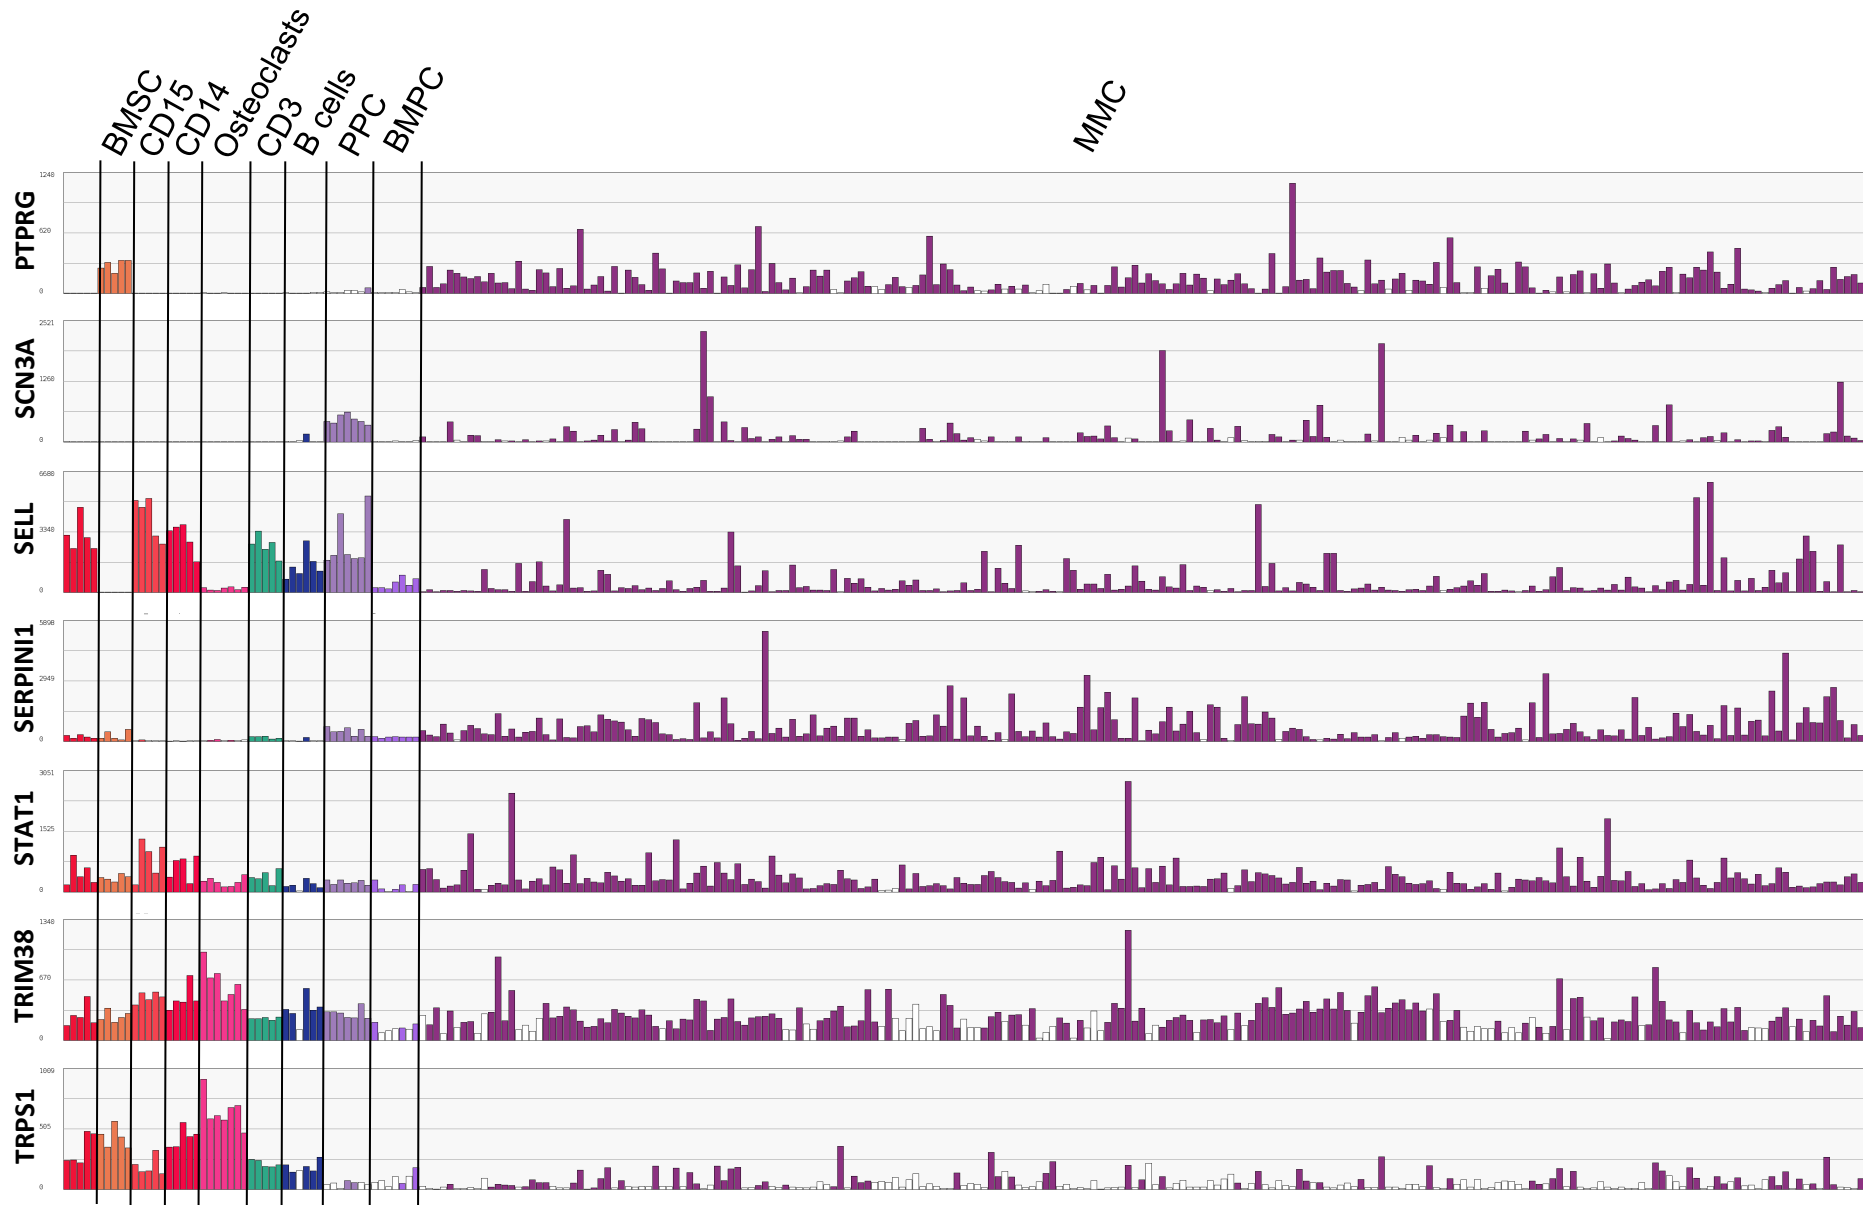

# HA Score: Good prognostic genes

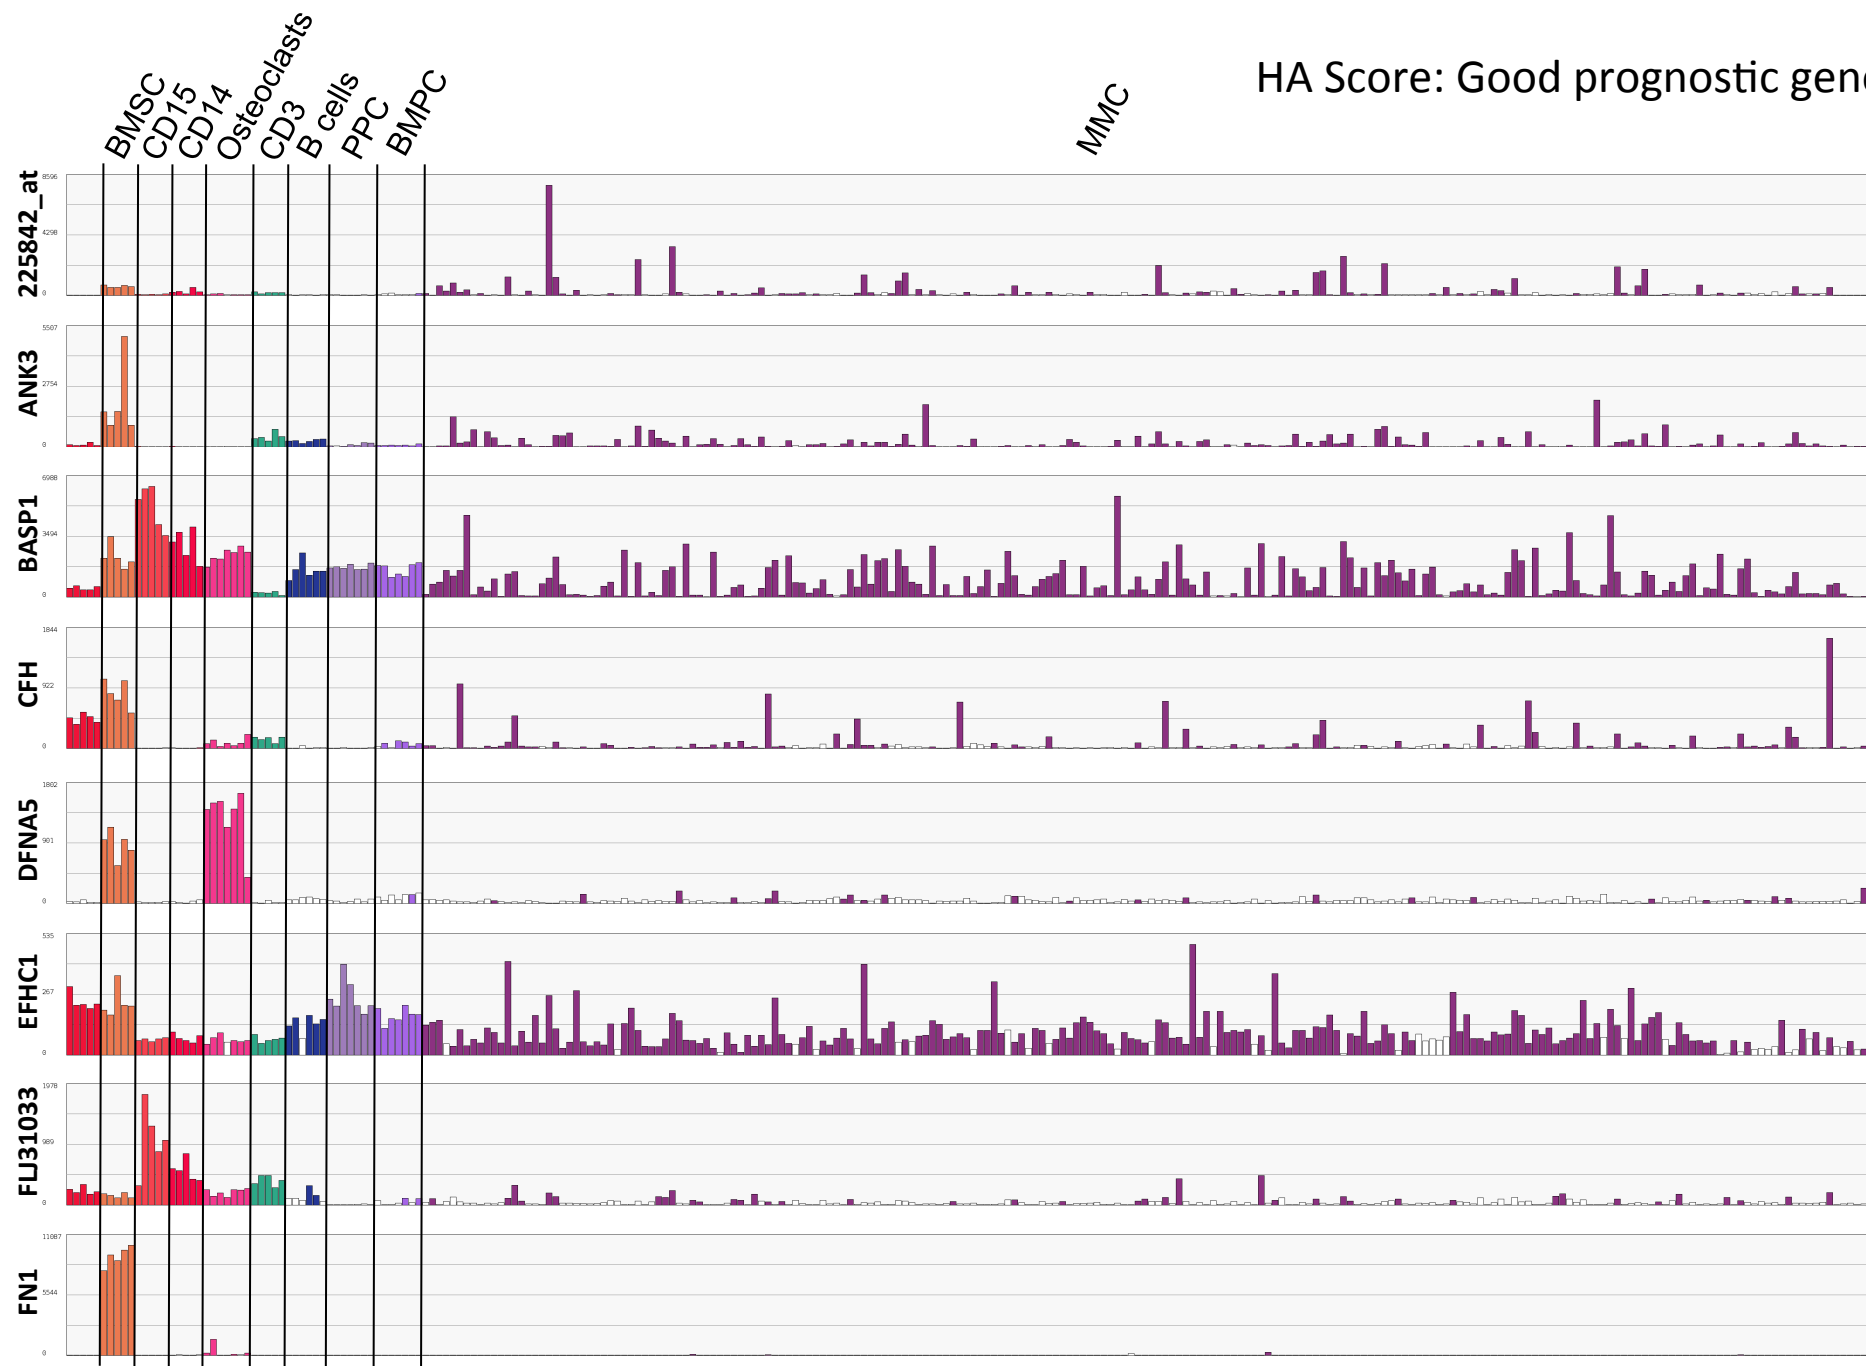

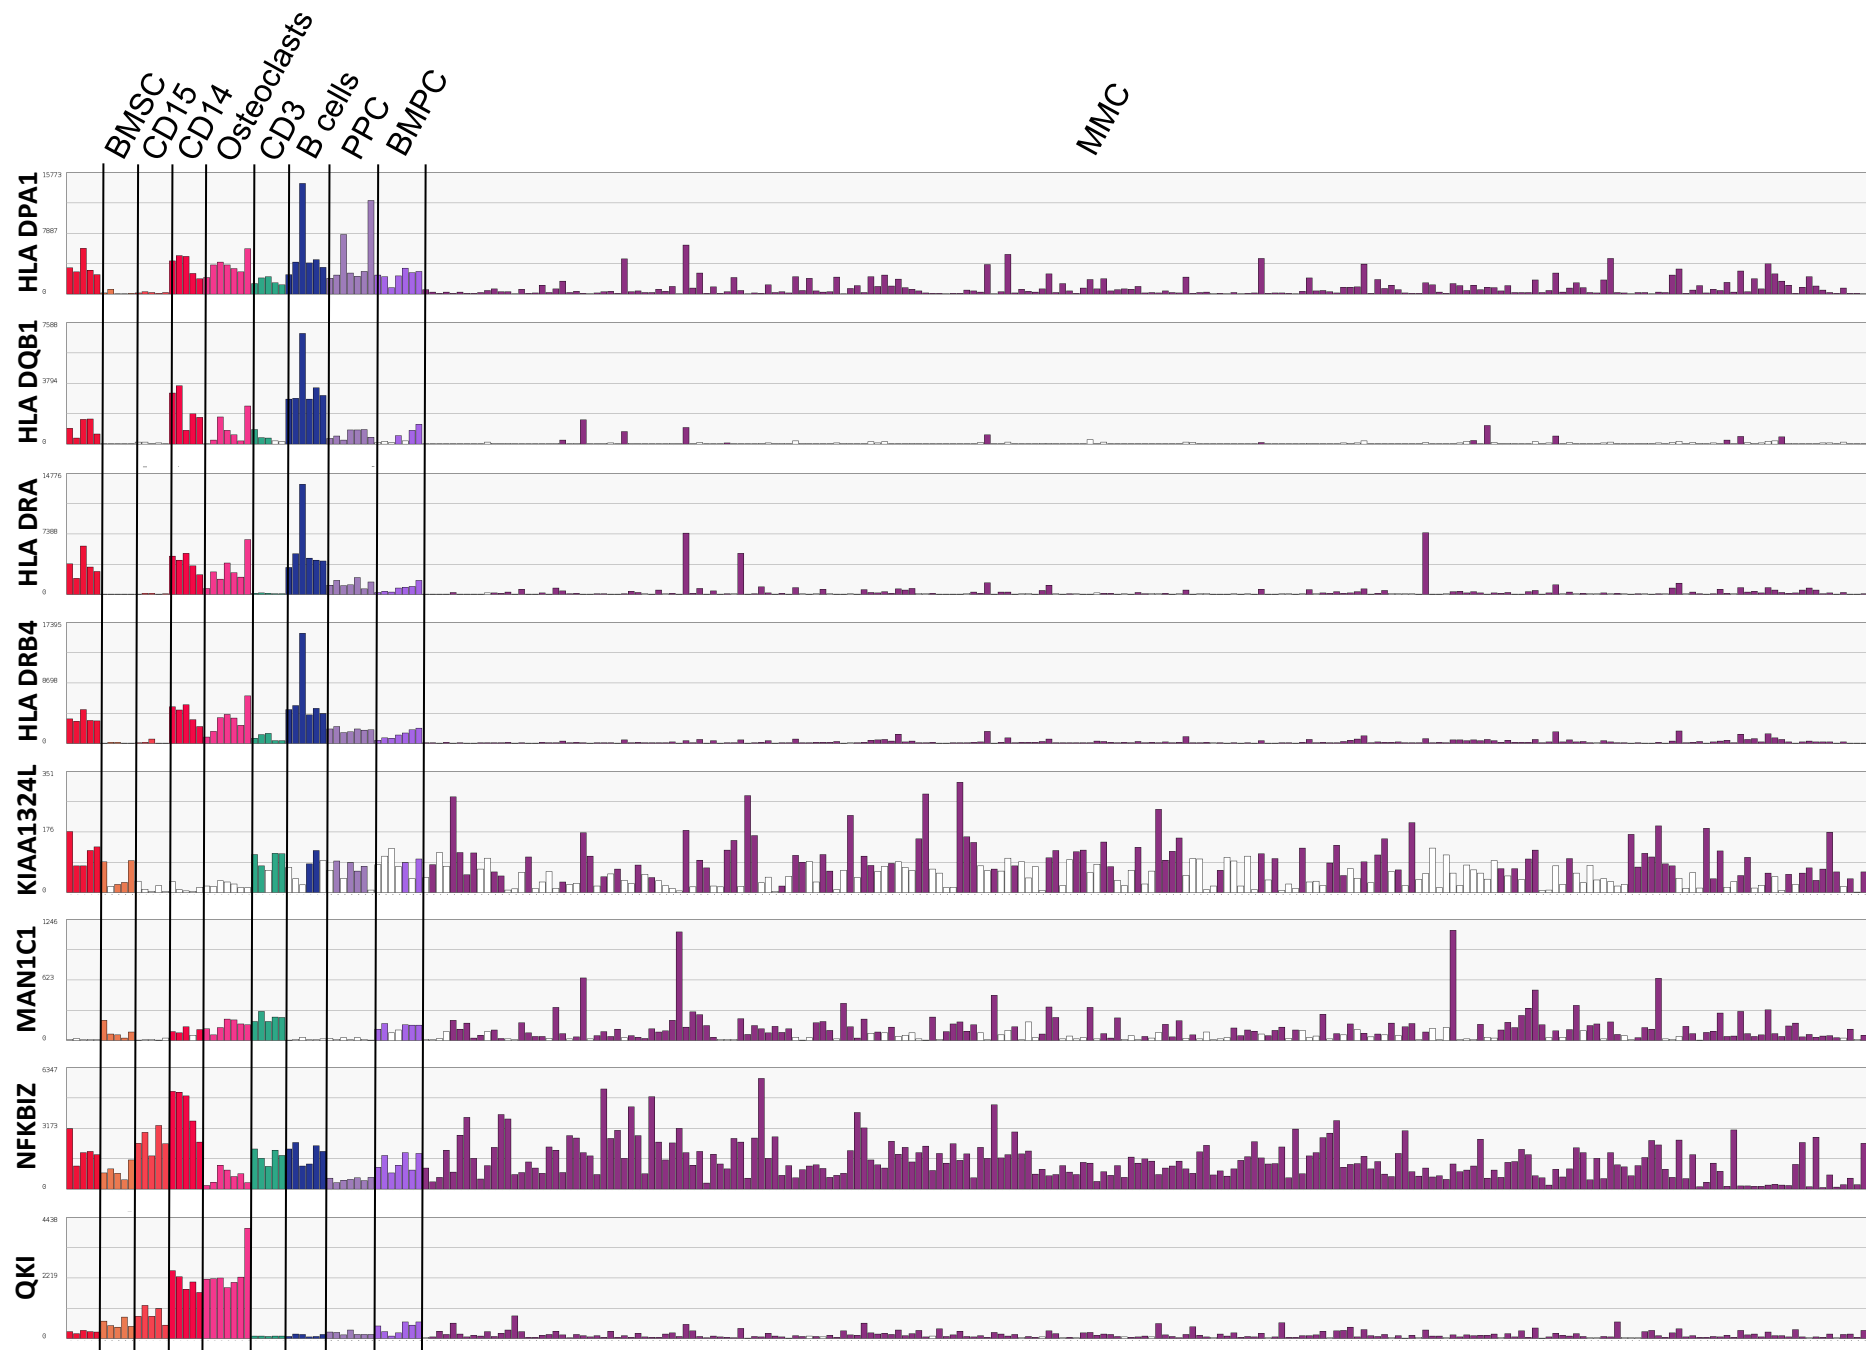

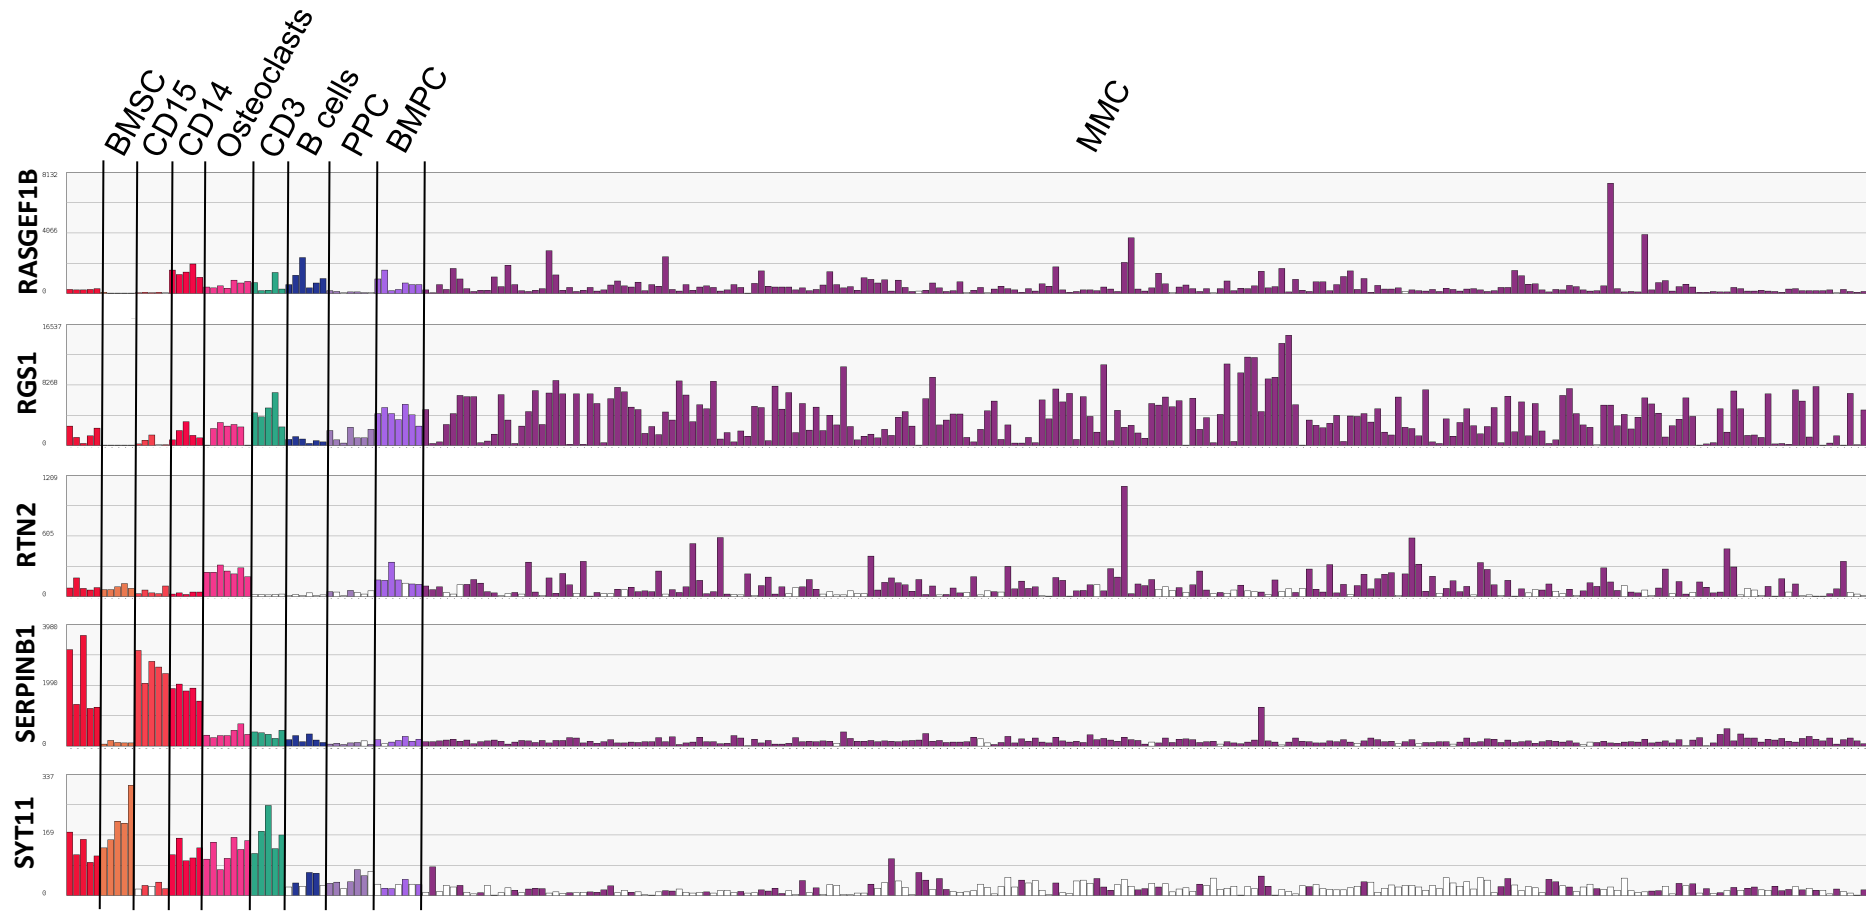

Supplementary Figure S3: Affymetrix gene expression of the 37 genes used to build HA Score in BM CD34 cells (n = 5), BM stromal cells (n = 5), purified BM CD15 (n = 5), CD14 (n = 5) and CD3 cells (n = 5), osteoclasts (n = 7), normal memory B cells (n = 5), normal polyclonal plasmablasts (n = 7), normal BM plasma cells (BMPC) (n = 7), and purified myeloma cells from patients with multiple myeloma (MM) (n = 206).
